# Supplementary material for: Photochemical reduction of CO 2 into CO coupling with triethanolamine decomposition
Source: Royal Society of Chemistry journal article supplement (doi:10.1039/d3ra06585e), 2023-01-01
Supplement: d3ra06585e1.pdf [file d3ra06585e1.pdf]

## Supporting Information

### Photochemical reduction of CO<sub>2</sub> into CO coupling with triethanolamine decomposition

Zhen Li<sup>1,\*</sup>, Caili Yang<sup>1</sup>, Yingshi Su<sup>1</sup>, Yonghui Cheng<sup>1</sup>, Yanjia Cui<sup>1</sup>, Suyao Liu<sup>1</sup>,  
Yiwen Fang<sup>1</sup>

*<sup>1</sup> College of Chemistry & Chemical Engineering and Key Laboratory for Preparation and  
Application of Ordered Structural Materials of Guangdong Province, Shantou University,  
Shantou 515063, China*

\*Corresponding e-mails: [lizhenlicp@stu.edu.cn](mailto:lizhenlicp@stu.edu.cn)

## Experimental section

### Chemicals

Triethanolamine (TEOA, GR) was purchased from Aladdin (Shanghai, China). Deuterium oxide (D<sub>2</sub>O) was purchased from Shanghai Macklin Biochemical Co., Ltd. High purity CO<sub>2</sub> (99.99%) and N<sub>2</sub> (99.99%) gas was purchased from Huizhou Kaimeite Gas Co., Ltd. <sup>13</sup>CO<sub>2</sub> gas was purchased from Innochem Technology Co., Ltd. All materials in this work were used as received without further purification.

### Photochemical CO<sub>2</sub> reduction performance measurements

Photochemical CO<sub>2</sub> reduction performance were investigated in a 250 mL custom-built cell (efficient irradiation area about 12.5 cm<sup>2</sup>) with different volume ratio of TEOA and H<sub>2</sub>O. The light source was a 300 W Xenon lamp. In a typical experiment, 95 mL deionized water was added into the photoreaction cell, and then 5 mL TEOA was injected into the deionized water under the magnetic stirring condition. Prior to light irradiation, the mixture solution was degassed by bubbling high purity CO<sub>2</sub> gas for 30 min to remove the oxygen. The gaseous products were detected using on-line gas chromatography (GC) (Shimadzu, GC-2014C). The mixture solution after photochemical CO<sub>2</sub> reduction reaction was freeze-dried for 48 h to remove water, while the achieved residual substance was used for subsequent characterization.

The apparent quantum yield (AQY) was performed with a 300 W Xe lamp irradiation equipped with various band-pass filters (254, 275, 295, 313, 350, 365 and 380 nm). And the photon flux of the incident light was quantified by a Ray virtual radiation actinometer. The AQY was calculated according to equation 1:

$$\text{AQE} [\%] = n_{\text{CO}} / n_{\text{p}} \times 100\% \quad (1)$$

Where the  $n_{\text{CO}}$  represents the mole number of CO generation, and the  $n_{\text{p}}$  represents the number of incident photons.

### Characterizations

The attenuated total reflectance Fourier transform infrared spectroscopy (ATR-

FTIR) was recorded on a Fourier transform infrared spectrometer (Nicolet iS50). The  $^1\text{H}$  and  $^{13}\text{C}$  nuclear magnetic resonance (NMR) spectroscopy were acquired on Bruker Avance III 600 MHz spectrometer. High resolution mass spectra (MS) were recorded using a Q Exactive mass spectrometer (Thermo Fisher Scientific, USA). The ultraviolet-visible (UV-vis) absorption spectrum was performed on lambda 950 UV/VIS spectrometer (Perkin Elmer, USA).

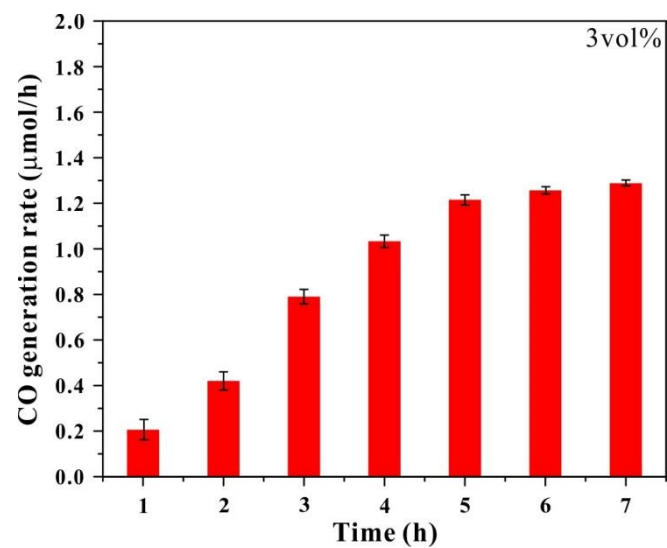

Figure S1 The time-depended performance of photochemical CO<sub>2</sub> reduction in 3 vol% TEOA aqueous solution under light irradiation. The error bars represent the standard deviation of three separate measurements.

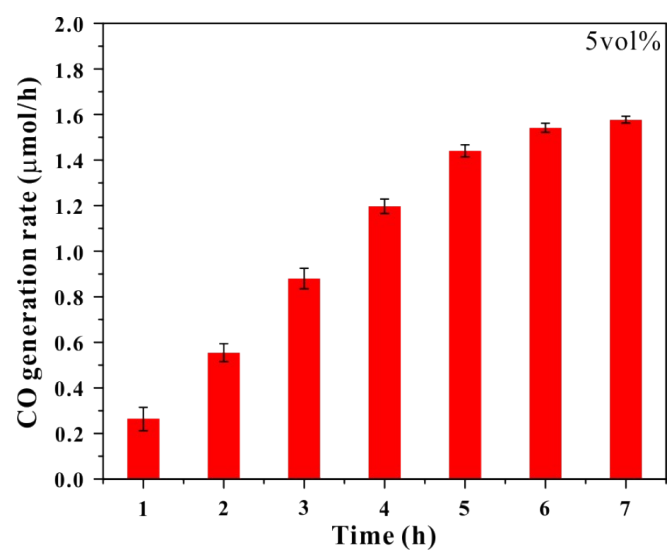

Figure S2 The time-depended performance of photochemical CO<sub>2</sub> reduction in 5vol% TEOA aqueous solution under light irradiation. The error bars represent the standard deviation of three separate measurements.

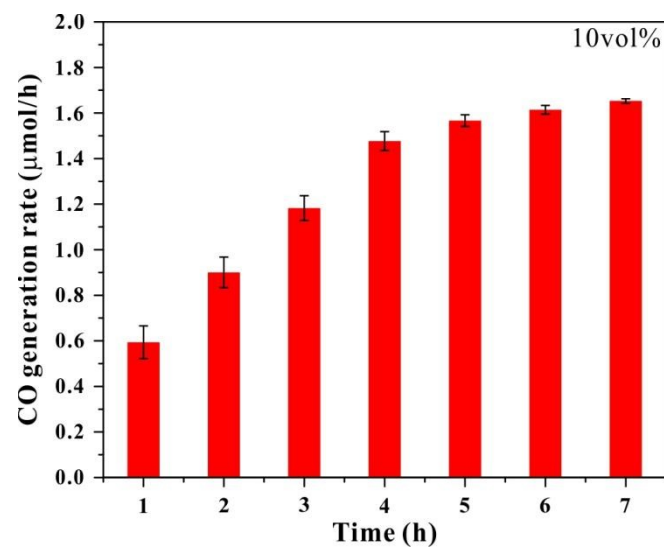

Figure S3 The time-depended performance of photochemical CO<sub>2</sub> reduction in 10vol% TEOA aqueous solution under light irradiation. The error bars represent the standard deviation of three separate measurements.

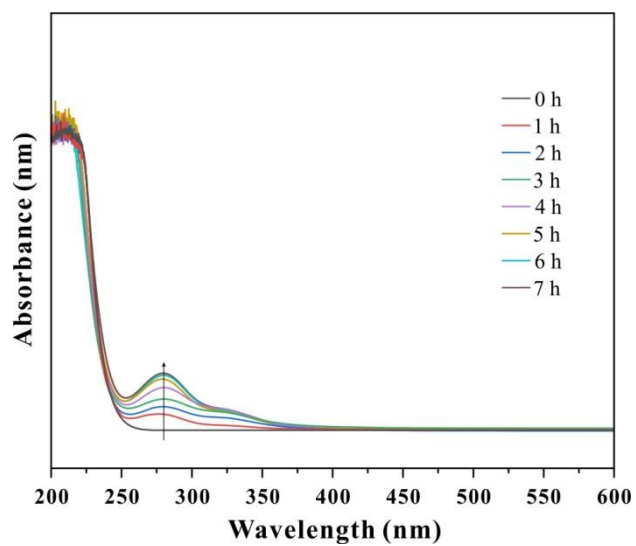

Figure S4 The UV-vis absorption spectra of 5vol% TEOA aqueous solution during photochemical CO<sub>2</sub> reduction with different irradiation time.

Table S1 The photochemical reaction under different sets of conditions.

| Entry | Gas             | Ligth condition                        | TEOA volume percentage | CO generation rate ( $\mu\text{mol/h}$ ) |
|-------|-----------------|----------------------------------------|------------------------|------------------------------------------|
| 1     | CO <sub>2</sub> | Full spectrum                          | 3vol%                  | 1.29                                     |
| 2     | CO <sub>2</sub> | Full spectrum                          | 5vol%                  | 1.58                                     |
| 3     | CO <sub>2</sub> | Full spectrum                          | 10vol%                 | 1.65                                     |
| 4     | CO <sub>2</sub> | visible light ( $\lambda \geq 420$ nm) | 5vol%                  | –                                        |
| 5     | N <sub>2</sub>  | Full spectrum                          | 5vol%                  | –                                        |



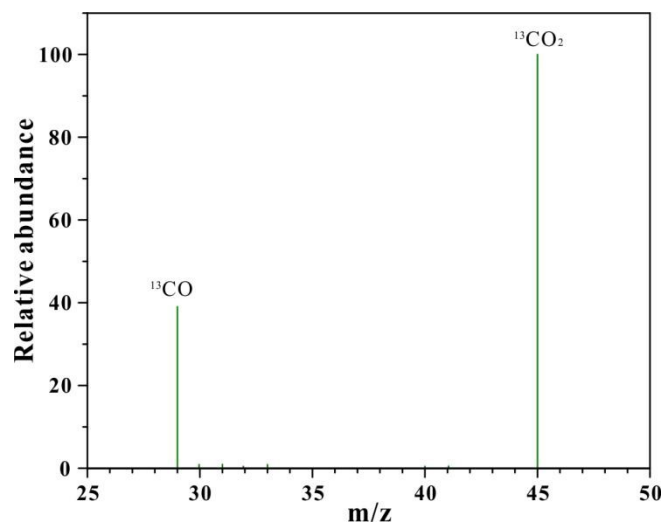

Figure S5 Mass spectra via gas chromatography of the generated gas from 5vol% TEOA aqueous solution under 1 atm  $^{13}\text{CO}_2$  within 10 h irradiation.

Table S2. The results of AQY measurements under AM 1.5G solar simulator light source with different wavelengths in 5vol% TEOA aqueous solution.

| Wavelength (nm) | $N_a$ ( $\mu\text{mol h}^{-1}$ ) | Activity ( $\mu\text{mol h}^{-1}$ ) | AQY of $\text{CO}_2$ (%) |
|-----------------|----------------------------------|-------------------------------------|--------------------------|
|                 |                                  | CO                                  |                          |
| 254             | 66.24                            | 0.113                               | 0.086                    |
| 275             | 64.81                            | 0.039                               | 0.030                    |
| 295             | 57.65                            | 0.051                               | 0.044                    |
| 313             | 67.68                            | 0.015                               | 0.011                    |
| 350             | 324.03                           | 0.050                               | 0.008                    |
| 365             | 381.62                           | 0.074                               | 0.010                    |
| 380             | 237.67                           | 0.080                               | 0.017                    |

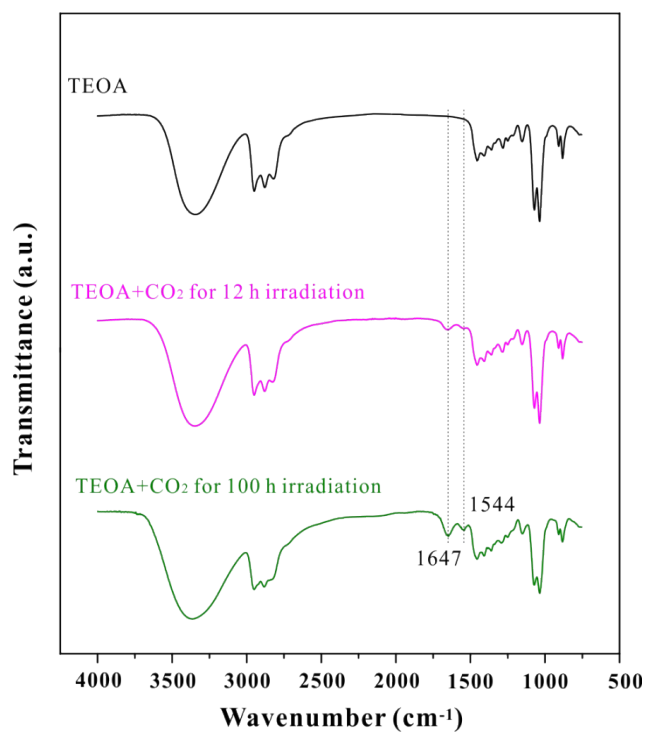

Figure S6 The ATR-FTIR observation of pure TEOA, TEOA after 12 or 100 h irradiation under CO<sub>2</sub> bubbling condition. The TEOA after photochemical reaction in 5vol% TEOA aqueous solution is achieved by freeze-drying for 48 h to remove residual water.

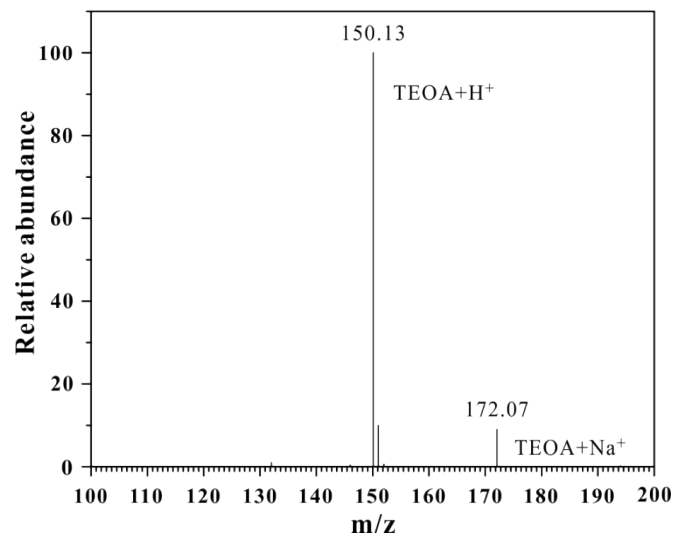

Figure S7 Mass spectra via liquid chromatography of pure TEOA. The solution consists of 100  $\mu$ L pure TEOA and 1.9 mL deionized water.

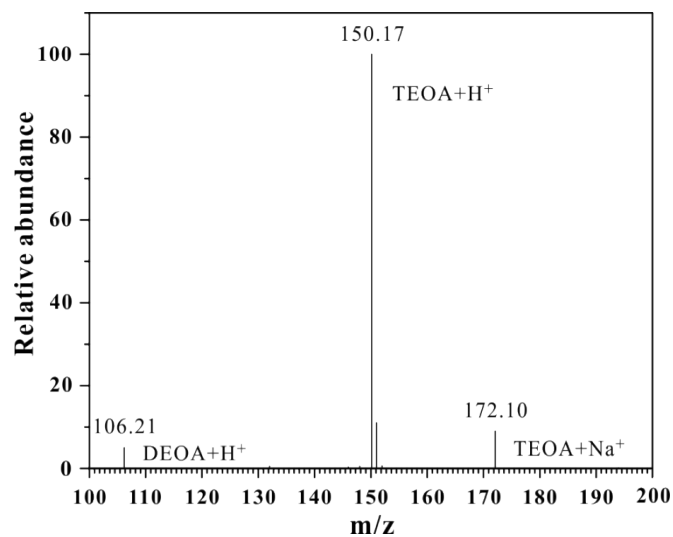

Figure S8 Mass spectra via liquid chromatography of TEOA after 12 h irradiation under CO<sub>2</sub> bubbling condition. The solution consists of 100  $\mu$ L TEOA and 1.9 mL deionized water. The TEOA after photochemical reaction in 5vol% TEOA aqueous solution is achieved by freeze-drying for 48 h to remove residual water.

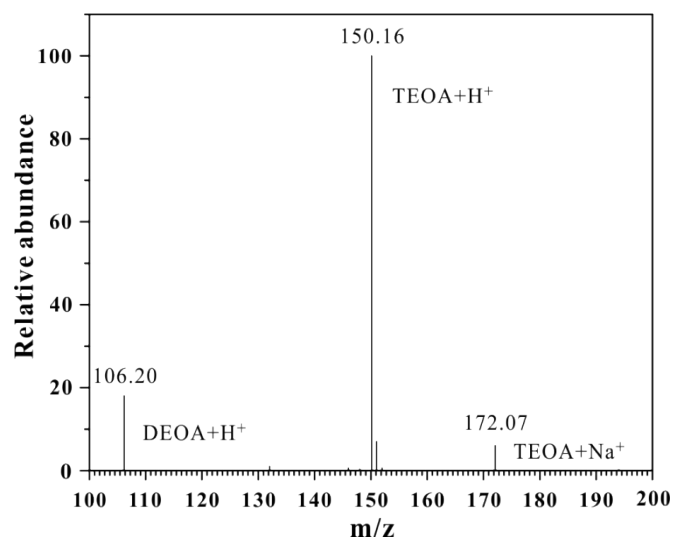

Figure S9 Mass spectra via liquid chromatography of TEOA after 100 h irradiation under CO<sub>2</sub> bubbling condition. The solution consists of 100 μL TEOA and 1.9 mL deionized water. The TEOA after photochemical reaction in 5vol% TEOA aqueous solution is achieved by freeze-drying for 48 h to remove residual water.

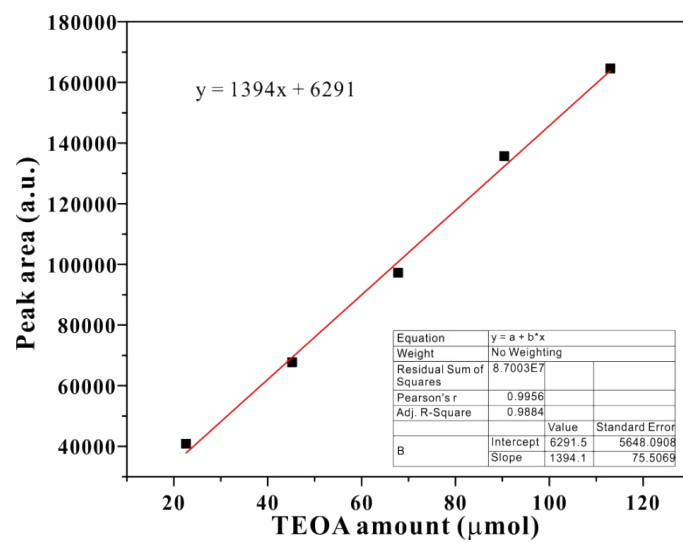

Figure S10 Standard curve of TEOA for  $^1\text{H}$  NMR analysis.
